# Supplementary material
Source: PubMed Central journal article supplement (PMC4533282)
Supplement: peds.2014-1286_peds.2014-1286SupplementaryData.pdf [file peds.2014-1286_peds.2014-1286SupplementaryData.pdf]

## Supplemental Information

**SUPPLEMENTAL TABLE 4** Effect of the Food and Service Retail Scale on the Likelihood of Developing Obesity in the CYGNET Study, 2007–2012 ( $n = 601$  Observations From 174 Girls)

|                                      | Estimate  | 95% CI           | <i>P</i> value |
|--------------------------------------|-----------|------------------|----------------|
| Race/ethnicity                       |           |                  |                |
| African American                     | 0.084     | −1.513 to 1.680  | 0.918          |
| Latina                               | −0.978    | −2.913 to 0.956  | 0.322          |
| Asian                                | 0.972     | −0.758 to 2.702  | 0.271          |
| White                                | Reference |                  |                |
| Baseline BMI                         | 5.781     | 4.107 to 7.455   | 0.000          |
| Pubarche (Tanner stage 2 or higher)  | −2.339    | −3.766 to −0.912 | 0.001          |
| Thelarche (Tanner stage 2 or higher) | 1.594     | 0.194 to 2.993   | 0.026          |
| Year of outcome measure              | −0.033    | −0.593 to 0.527  | 0.907          |
| Number of street segments            | −0.058    | −0.155 to 0.040  | 0.246          |
| Household income                     |           |                  |                |
| <\$25 000                            | 0.964     | −1.332 to 3.261  | 0.411          |
| \$25 000 to \$49 999                 | −1.118    | −2.885 to 0.649  | 0.215          |
| \$50 000 to \$74 999                 | 0.019     | −1.770 to 1.809  | 0.983          |
| \$75 000 to \$99 999                 | 0.565     | −0.560 to 1.691  | 0.325          |
| ≥\$100 000                           | Reference |                  |                |
| Household size                       | −0.515    | −0.974 to −0.056 | 0.028          |
| Highest degree of financial provider |           |                  |                |
| High school degree or less           | 2.074     | 0.092 to 4.055   | 0.040          |
| Some college/vocational school       | 1.979     | 0.565 to 3.394   | 0.006          |
| Associate's degree                   | 3.847     | 1.778 to 5.916   | 0.000          |
| College degree                       | −0.536    | −1.931 to 0.860  | 0.452          |
| Education past bachelor's degree     | Reference |                  |                |
| Neighborhood SES (census tract)      | 0.138     | −0.369 to 0.644  | 0.595          |
| Food and service retail scale        | 0.819     | 0.353 to 1.284   | 0.001          |

**SUPPLEMENTAL TABLE 5** Effect of the Recreation Scale on the Likelihood of Developing Obesity in the CYGNET Study, 2007–2012 (*n* = 601 Observations From 174 Girls)

|                                      | Estimate  | 95% CI         | <i>P</i> value |
|--------------------------------------|-----------|----------------|----------------|
| Race/ethnicity                       |           |                |                |
| African American                     | −0.108    | −1.486, 1.270  | 0.878          |
| Latina                               | −0.841    | −2.462, 0.780  | 0.309          |
| Asian                                | 0.333     | −1.504, 2.170  | 0.723          |
| White                                | Reference |                |                |
| Baseline BMI                         | 5.446     | 3.577, 7.316   | 0.000          |
| Pubarche (Tanner stage 2 or higher)  | −1.959    | −3.496, −0.422 | 0.013          |
| Thelarche (Tanner stage 2 or higher) | 1.680     | −0.046, 3.405  | 0.056          |
| Year of outcome measure              | −0.018    | −0.560, 0.523  | 0.947          |
| Number of street segments            | −0.014    | −0.103, 0.074  | 0.752          |
| Household income                     |           |                |                |
| <\$25 000                            | 0.053     | −2.238, 2.345  | 0.964          |
| \$25 000 to \$49 999                 | −1.296    | −3.080, 0.488  | 0.154          |
| \$50 000 to \$74 999                 | −0.272    | −2.146, 1.602  | 0.776          |
| \$75 000 to \$99 999                 | 0.664     | −0.508, 1.837  | 0.267          |
| ≥\$100 000                           | Reference |                |                |
| Household size                       | −0.579    | −1.065, −0.093 | 0.020          |
| Highest degree of financial provider |           |                |                |
| High school degree or less           | 3.087     | 1.200, 4.974   | 0.001          |
| Some college/vocational school       | 2.045     | 0.253, 3.837   | 0.025          |
| Associate's degree                   | 3.251     | 1.122, 5.379   | 0.003          |
| College degree                       | −0.458    | −1.761, 0.846  | 0.492          |
| Education past bachelor's degree     | Reference |                |                |
| Neighborhood SES (census tract)      | 0.050     | −0.445, 0.545  | 0.843          |
| Recreation scale                     | −0.174    | −0.684, 0.336  | 0.504          |

**SUPPLEMENTAL TABLE 6** Effect of the Walkability Scale on the Likelihood of Developing Obesity in the CYGNET Study, 2007–2012 (*n* = 601 Observations From 174 Girls)

|                                      | Estimate  | 95% CI         | <i>P</i> value |
|--------------------------------------|-----------|----------------|----------------|
| Race/ethnicity                       | 0.049     | −1.307, 1.405  | 0.944          |
| African American                     | −0.700    | −2.422, 1.021  | 0.425          |
| Latina                               | 0.077     | −1.553, 1.706  | 0.927          |
| Asian                                | 5.442     | 3.659, 7.225   | 0.000          |
| White                                | Reference |                |                |
| Baseline BMI                         | −2.080    | −3.529, −0.631 | 0.005          |
| Pubarche (Tanner stage 2 or higher)  | 1.762     | 0.068, 3.456   | 0.042          |
| Thelarche (Tanner stage 2 or higher) | −0.017    | −0.561, 0.527  | 0.951          |
| Year of outcome measure              | −0.009    | −0.106, 0.087  | 0.848          |
| Number of street segments            |           |                |                |
| Household income                     | −0.237    | −2.585, 2.112  | 0.844          |
| <\$25 000                            | −1.388    | −3.139, 0.363  | 0.120          |
| \$25 000 to \$49 999                 | −0.499    | −2.246, 1.248  | 0.576          |
| \$50 000 to \$74 999                 | 0.630     | −0.521, 1.781  | 0.284          |
| \$75 000 to \$99 999                 | −0.615    | −1.150, −0.080 | 0.024          |
| ≥\$100 000                           | Reference |                |                |
| Household size                       |           |                |                |
| Highest degree of financial provider | 3.184     | 1.184, 5.184   | 0.002          |
| High school degree or less           | 2.042     | 0.228, 3.855   | 0.027          |
| Some college/vocational school       | 3.313     | 1.153, 5.473   | 0.003          |
| Associate's degree                   | −0.516    | −1.743, 0.712  | 0.410          |
| College degree                       | 0.064     | −0.474, 0.602  | 0.816          |
| Education past bachelor's degree     | Reference |                |                |
| Neighborhood SES (census tract)      | −0.162    | −0.631, 0.308  | 0.500          |
| Walkability scale                    | 0.049     | −1.307, 1.405  | 0.944          |

**SUPPLEMENTAL TABLE 7** Effect of the Physical Disorder Scale on the Likelihood of Developing Obesity in the CYGNET Study, 2007–2012 (*n* = 601 Observations From 174 Girls)

|                                      | Estimate  | 95% CI           | <i>P</i> value |
|--------------------------------------|-----------|------------------|----------------|
| Race/ethnicity                       | −0.323    | −1.809 to 1.162  | 0.670          |
| African American                     | −1.144    | −2.861 to 0.573  | 0.192          |
| Latina                               | −0.106    | −2.025 to 1.813  | 0.914          |
| Asian                                | 5.440     | 3.802 to 7.077   | 0.000          |
| White                                | Reference |                  |                |
| Baseline BMI                         | −2.162    | −3.543 to −0.781 | 0.002          |
| Pubarche (Tanner stage 2 or higher)  | 1.688     | 0.221 to 3.155   | 0.024          |
| Thelarche (Tanner stage 2 or higher) | −0.015    | −0.589 to 0.560  | 0.960          |
| Year of outcome measure              | −0.077    | −0.171 to 0.018  | 0.111          |
| Number of street segments            |           |                  |                |
| Household income                     | 1.035     | −1.168 to 3.238  | 0.357          |
| <\$25 000                            | −0.879    | −2.737 to 0.978  | 0.353          |
| \$25 000–\$49 999                    | 0.438     | −1.722 to 2.598  | 0.691          |
| \$50 000–\$74 999                    | 0.999     | −0.009 to 2.007  | 0.052          |
| \$75 000–\$99 999                    | −0.424    | −0.914, 0.067    | 0.090          |
| ≥\$100 000                           | Reference |                  |                |
| Household size                       |           |                  |                |
| Highest degree of financial provider | 2.874     | 0.925 to 4.823   | 0.004          |
| High school degree or less           | 2.389     | 0.596 to 4.181   | 0.009          |
| Some college/vocational school       | 4.157     | 2.023 to 6.291   | 0.000          |
| Associate's degree                   | 0.692     | −0.846, 2.231    | 0.378          |
| College degree                       | 0.067     | −0.381 to 0.515  | 0.770          |
| Education past bachelor's degree     | Reference |                  |                |
| Neighborhood SES (census tract)      | 0.879     | 0.267 to 1.491   | 0.005          |
| Physical disorder scale              | −0.323    | −1.809 to 1.162  | 0.670          |
